# Supplementary material for: Assessing a Bayesian Approach for Detecting Exotic Hybrids between Plantation and Native Eucalypts
Source: Hindawi journal article supplement (doi:10.1155/2014/650202), 2014-01-01
Supplement: f1 [file 650202.f1.zip]

Archive with 3 entries (3 files):
- 777065.pdf
- 777066.pdf
- 777067.pdf
