# Supplementary material for: Assessing a Bayesian Approach for Detecting Exotic Hybrids between Plantation and Native Eucalypts
Source: Hindawi journal article supplement (doi:10.1155/2014/650202), 2014-01-01
Supplement: f1 [file 650202.f1.zip]

## Supplementary Material 2:

### Additional results

Associated paper: Assessing a Bayesian approach for detecting exotic hybrids between  
plantation and native eucalypts

In: *International Journal of Forestry Research*

Larcombe MJ, Vaillancourt RE, Jones RC, Potts BM

Corresponding email: [ml5@utas.edu.au](mailto:ml5@utas.edu.au)

**Table 1.** Genetic diversity parameters for six *Eucalyptus* species genotyped at 10 microsatellite loci. Parameters:  $n$  = number of individuals genotyped;  $N_a$  = average number of alleles per locus;  $P_a$  = total number of private alleles;  $H_e$  = expected heterozygosity;  $H_o$  = observed heterozygosity.

| Species                 | $n$ | $N_a$ | $P_a$ | $H_e$          | $H_o$ |
|-------------------------|-----|-------|-------|----------------|-------|
| <i>E. camaldulensis</i> | 97  | 25.2  | 28    | 0.89           | 0.78  |
| <i>E. cypellocarpa</i>  | 97  | 22.8  | 13    | 0.91           | 0.82  |
| <i>E. globulus</i>      | 87  | 19.3  | 6     | 0.87           | 0.78  |
| <i>E. nitens</i>        | 88  | 17.2  | 4     | 0.83           | 0.68  |
| <i>E. ovata</i>         | 100 | 20.9  | 5     | 0.82           | 0.68  |
| <i>E. viminalis</i>     | 87  | 23.2  | 8     | 0.89           | 0.82  |
| Hybrids combined        | 50  | 18.3  | 3     | - <sup>a</sup> | 0.91  |
| Total                   | 606 | 21.0  | 66    | 0.87           | 0.78  |

<sup>a</sup> it is inappropriate to calculate  $H_e$  across multiple species

**Table 2.** Comparison of the accuracy of two- and six-way Bayesian cluster analysis for indentifying hybrids. Comparisons are the average across 50 simulated parental and 50 simulated F<sub>1</sub> generations for each combination between *Eucalyptus globulus* and five other species.

| Combination                               | Accuracy (%)     |                  |
|-------------------------------------------|------------------|------------------|
|                                           | Two-way analysis | Six-way analysis |
| <i>E. camaldulensis</i> x <i>globulus</i> | 99               | 85               |
| <i>E. cypellocarpa</i> x <i>globulus</i>  | 84               | 65               |
| <i>E. nitens</i> x <i>globulus</i>        | 99               | 92               |
| <i>E. ovata</i> x <i>globulus</i>         | 97               | 83               |
| <i>E. viminalis</i> x <i>globulus</i>     | 94               | 69               |

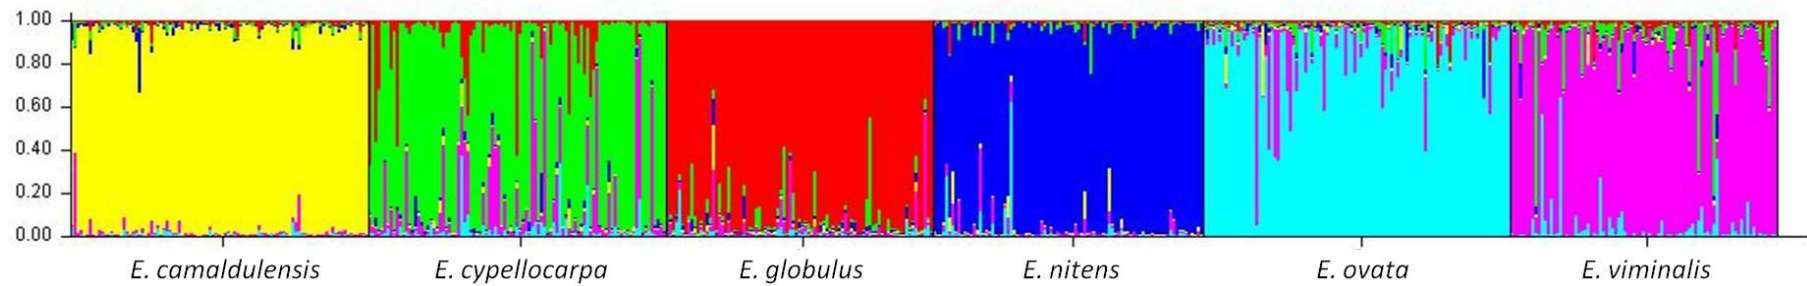

Figure 1. Proportion of genotype membership of 556 individuals from six eucalyptus species based on Bayesian cluster analysis (in STRUCTURE) at  $K = 6$ , using no *a priori* species information. All individuals were genotyped at 10 microsatellite loci. Each individual is represented by a single vertical line that is partitioned based on its genotype affinities to one of six genetic clusters (represented by the six colours), and samples are ordered based on their morphological species classification. The genotype affinities of the samples clearly correspond to the species classifications indicating that STRUCTURE differentiates the six species at  $K = 6$ .
